# Supplementary material
Source: Elsevier journal article supplement (https://www.sciencedirect.com/science/article/pii/S2659663620300175)

## **RESUMEN EJECUTIVO**

El SAHS tiene un innegable impacto en la calidad de vida de las personas que lo sufren (4-6% de los hombres y 2-4% de las mujeres en edad adulta) y se está demostrando como un potencial factor de riesgo que puede empeorar problemas de salud de primera índole, como la hipertensión arterial, aumento del riesgo de sufrir complicaciones cardiovasculares y accidentes cerebrovasculares, y accidentes de tráfico. Debido al impacto social, económico y sanitario del SAHS, se hace necesario realizar un esfuerzo conjunto para mejorar su comprensión, diagnóstico, tratamiento y seguimiento.

En España entre 1.500.000 y 2.500.000 personas tiene un SAHS relevante y a pesar de la divulgación realizada en los últimos años, sólo un 25% recibe tratamiento.

Del casi millón de pacientes que reciben tratamiento de Terapias Respiratorias a Domicilio, un 66% lo hacen para el tratamiento del SAHS, siendo un 12% de ellos pacientes en los que coexiste además Síndrome de Hipoventilación asociado a Obesidad.

Para los próximos años se espera que el número de pacientes en tratamiento siga aumentando, debido a una mejora en la capacidad diagnóstica y a factores relacionados, como la obesidad, el sedentarismo y otros ligados a los riesgos derivados del síndrome metabólico.

Se ha demostrado que los costes en salud de los pacientes que no reciben tratamiento aumentan entre un 50 al 100% y que el ahorro medio por paciente tratado es de 777€. Si se pasase a tratar al 50% de los pacientes en lugar del 25% actual se generaría un ahorro de 80 millones de euros al sistema sanitario.

## **DIAGNÓSTICO**

El diagnóstico del SAHS se ha de realizar en las Unidades de Sueño. Actualmente, a nivel nacional se cuenta con 24 unidades multidisciplinarias, 18 unidades respiratorias y 22 unidades básicas acreditadas por distintas sociedades científicas. En el proceso diagnóstico es

imprescindible la colaboración de la Medicina de Atención Primaria con el fin de mejorar el problema del infradiagnóstico. La figura 1 resume el algoritmo de diagnóstico y tratamiento del SAHS.

## TRATAMIENTO

La complejidad del SAHS hace fundamental que su abordaje sea multidisciplinar para que se pueda coordinar el proceso a lo largo de todo el circuito asistencial. Sólo así se podrá mejorar en la gestión de una enfermedad tan prevalente.

El tratamiento con CPAP, en diferentes estudios llevados a cabo, ha puesto de manifiesto su eficacia para reducir el número de apneas e hipopneas en pacientes que realizan un cumplimiento efectivo, y en recientes estudios apunta a que tiene un impacto significativo en la reducción de accidentes de tráfico en pacientes que sufren SAHS, favorece el control de la tensión arterial y mejora la calidad de vida.

Las indicaciones de la CPAP son el control de los síntomas del SAHS y reducir sus riesgos asociados. La CPAP es el tratamiento de elección para el SAHS, siendo reservados los equipamientos más sofisticados para los pacientes que presentan un mayor nivel de complejidad.

La CPAP se debe pautar cuando tras la realización de las pruebas diagnósticas, el paciente presente un Índice de Apneas Hipopneas (IAH)  $> 30$  episodios por hora, acompañado de sintomatología relevante y/o comorbilidades asociadas.

Los pacientes con IAH  $\geq 15$  hasta 30 y síntomas relevantes (como somnolencia excesiva o despertares con sensación asfíctica no esporádicos) y/o con morbilidad o trastornos cardiovasculares, son susceptibles de tratamiento con CPAP nasal, pero deben de evaluarse individualmente.

En este momento no existe evidencia de indicación con CPAP en pacientes con IAH  $< 15$ .

Lo cierto es que hoy por hoy el tratamiento más efectivo, y por tanto de elección, es la CPAP, pero la efectividad de los dispositivos de CPAP depende de su utilización. La CPAP es el elemento crucial del tratamiento del SAHS y debería ser utilizada de por vida, todos los días y durante todo el periodo de sueño del paciente.

Otros tratamientos alternativos a la CPAP se emplean dependiendo de las condiciones particulares de cada paciente y sus patologías de base.

No se contempla la utilización rutinaria de Auto-PAP como tratamiento inicial en pacientes con el diagnóstico recién establecido. La Auto-PAP puede considerarse en pacientes con necesidad de presiones elevadas que provoquen intolerancia o necesidad de presiones variables (cambio posicional, SAHS posicionales), siempre que éstas sean la causa de una mala tolerancia al tratamiento con CPAP. El paciente debería haber iniciado un tratamiento con CPAP convencional durante un mínimo de 3 meses antes de proceder al cambio a un dispositivo Auto-PAP.

El tratamiento con BPAP está limitado a los casos de pacientes en que coexiste SAHS y EPOC, que no toleran niveles altos de presión espiratoria, o cuando la presión requerida es elevada (que la AASM fija en 15 cm de H<sub>2</sub>O), o bien cuando coexista un síndrome de Hipoventilación con hipercapnia, como en el síndrome de obesidad-hipoventilación.

El tratamiento con Servo Ventilación Adaptativa (SVA) está indicado en pacientes con inestabilidad en el control ventilatorio, como los que presentan apneas centrales-síndrome de Cheyne-Stokes (excepto pacientes con insuficiencia cardíaca y fracción de eyección de ventrículo izquierdo  $\leq 45\%$ ), síndrome de apneas complejas, pacientes con apneas centrales asociadas a la toma de narcóticos o pacientes con apneas centrales por etiología desconocida y que no mejoran con CPAP.

## **SEGUIMIENTO Y CONTROL DE LOS PACIENTES CON CPAP**

La coordinación entre las diferentes partes implicadas en esta prestación, administraciones sanitarias, médicos y empresas prestadoras de servicio, es fundamental para ofrecer a los pacientes la mejor prestación posible, en cuanto a equipamiento, plan asistencial y eficacia de la terapia, garantizando un seguimiento adecuado de la misma.

La incorporación paulatina de los nuevos sistemas de telemonitorización puede suponer una modificación de los procesos asistenciales, fundamentalmente en el seguimiento de dispositivos CPAP y ventiladores. Este seguimiento a distancia proporciona una gran cantidad de datos que pueden derivarse en potenciales actuaciones con posible impacto sobre la adhesión al tratamiento de determinados perfiles de pacientes, si bien es necesario que se establezcan los mecanismos para la gestión eficiente de la información. Los mínimos datos que debe incluir un programa telemático de cumplimiento son las horas de uso efectivo, las fugas y el IAH residual. Estos datos deben incorporarse a los portales de acceso electrónico de las EPTR, donde es recomendable recoger, además, otras variables de salud.

Debido a que el cumplimiento del tratamiento con CPAP se determina en las primeras semanas del inicio de la terapia, el control de los pacientes debe ser máximo en ese periodo, ya que los primeros 3 meses pueden predecir el uso a largo plazo del dispositivo.

Los centros de atención al paciente de las EPTR juegan un papel fundamental en la adaptación inicial y el seguimiento del cumplimiento. En general, en menores de 18 años y en pacientes no autónomos, esta adaptación se realizará en el domicilio, bajo criterios de movilidad, accesibilidad, discapacidad física / psíquica, y en cualquier otra circunstancias bajo criterio médico. En pacientes en edad laboral y en los que tengan autonomía (con independencia de la edad) los centros serán el lugar de atención de los pacientes por defecto, en coordinación con las UTRS. La atención será máxima en los paucisintomáticos.

Los plazos recomendados para el control de estos pacientes por la empresa, en estrecha colaboración con el personal médico de las unidades, en función del cumplimiento, es el

descrito en el algoritmo de seguimiento indicado en la figura 4:

Las empresas revisarán los equipos según las recomendaciones específicas de los fabricantes, comprobando el buen funcionamiento, la reposición de accesorios en caso necesario y la verificación del cumplimiento durante los 3 primeros meses. A partir de este punto, es fundamental implementar las medidas de refuerzo de cumplimiento y el seguimiento en los incumplidores como mínimo durante 6 meses, mediante los distintos canales que se muestran en el algoritmo de seguimiento.

Respecto al mínimo tiempo de utilización necesario para considerar a un paciente como cumplidor y que el tratamiento muestre beneficios, existe cierto consenso al considerar como buena adherencia la utilización del dispositivo un mínimo de 4 horas/noche durante el 70% de las noches de la semana, que equivaldría, a efectos prácticos, a una media de 3 horas/noche.

Como recomendación general, una vez conseguido un buen cumplimiento terapéutico ( $\geq 4$  horas/ noche), sin efectos secundarios y constatándose una buena eficacia clínica, el paciente puede ser remitido a atención primaria (AP) para continuar con las revisiones, valorándose la posibilidad de revalidar la prescripción cada 5 años por las unidades de sueño.

Los médicos de AP y de las Unidades de Sueño deben recibir información sobre el grado de cumplimiento del tratamiento proporcionado por las EPTR.

Puesto que el tratamiento con CPAP no es curativo, debe usarse de forma continuada. La decisión de retirada del tratamiento por mal cumplimiento deberá individualizarse tras haber indagado sobre las posibles causas del mismo y haber evaluado la posible mejoría sintomática obtenida con las medidas generales.

En cualquier caso, podríamos considerar incumplimiento manifiesto el inferior a una media de 3 horas/noche. En estos casos debería incluirse al paciente en un programa de cumplimiento (escuela de CPAP, enfermera de enlace, refuerzo telefónico), y efectuar una nueva evaluación

transcurridos tres meses; si persistiera el incumplimiento se procedería a la retirada de la CPAP y a valorar un tratamiento alternativo.

La tarea de mejorar la calidad de vida de los pacientes con SAHS y garantizar el mejor proceso asistencial posible para esta patología es compromiso multifactorial y responsabilidad de todos los agentes implicados. Es un compromiso de la SEPAR generar procedimientos encaminados a lograr esos objetivos.

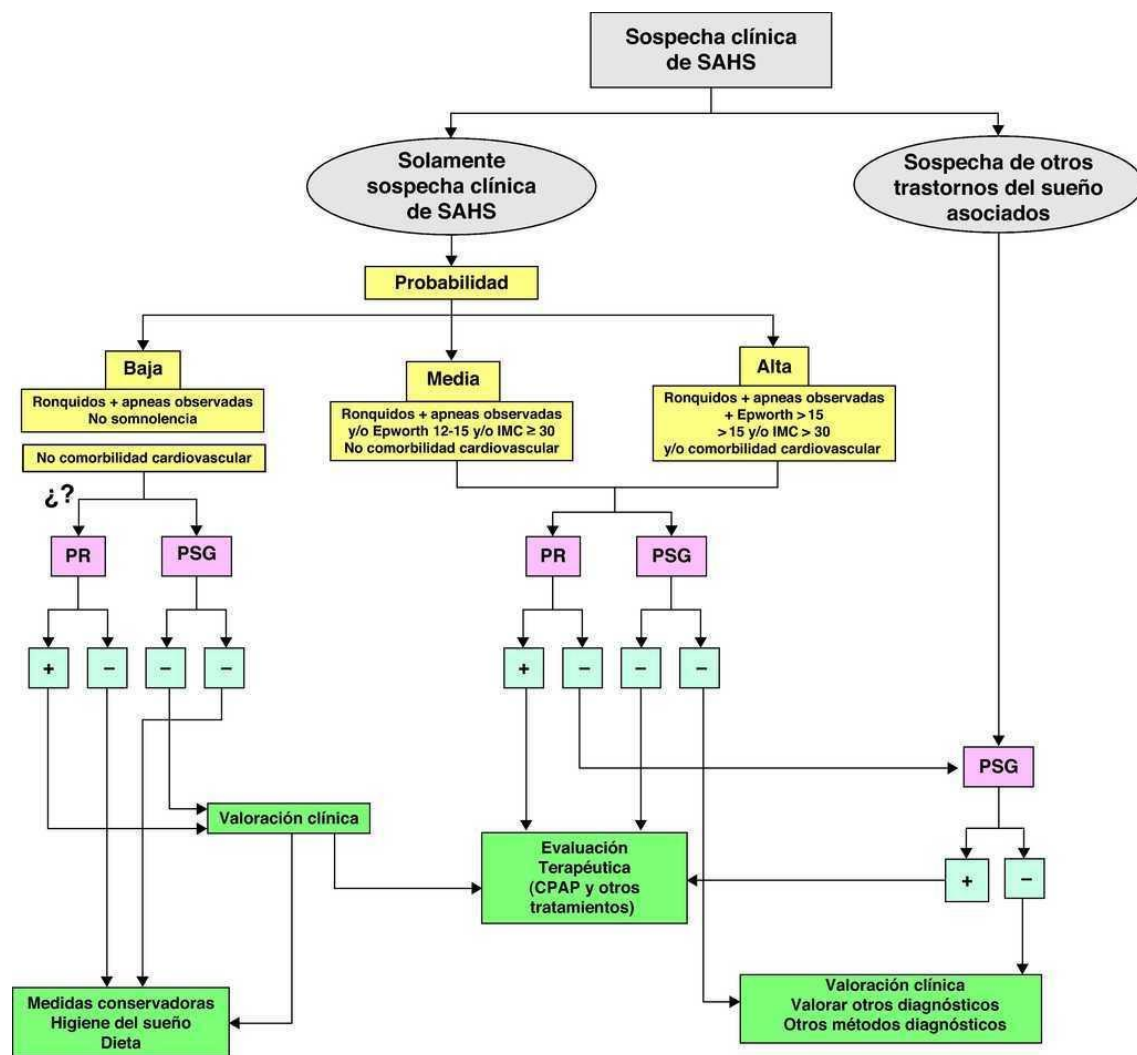

Supplement: mmc3 [file S2659663620300175:mmc3.pdf]
