# Supplementary material
Source: Elsevier journal article supplement (https://www.sciencedirect.com/science/article/pii/S2659663620300175)
Supplement: mmc1 [file S2659663620300175:mmc1.pdf]

## Anexo 1

### PROPUESTA DE DOCUMENTO DE RESPONSABILIDADES Y OBLIGACIONES DEL PACIENTE

Como beneficiario del Sistema Nacional de Salud, a través de la ...(Entidad Autonómica correspondiente)...**le ha sido prescrita una Terapia Respiratoria Domiciliaria** que va a ser prestada por ....., empresa concertada para la prestación de terapias respiratorias a domicilio en la Comunidad Autónoma donde usted reside.

Conforme a las directrices del propio hospital, a los requisitos mínimos establecidos en dicho concierto, y bajo protocolo aprobado por los médicos responsables de la prescripción, le **informamos de sus Responsabilidades y Obligaciones** en relación con su terapia.

Usted debe:

1. **Observar y cumplir las normas, recomendaciones, procedimientos de uso e instrucciones que se le ha facilitado.**
  - a) Debe cumplir las normas incluidas en este documento.
  - b) Usted tiene el deber de solicitar información sobre las normas de funcionamiento de la empresa suministradora y los canales de comunicación existentes entre los dos (preguntas, avisos, solicitudes...).
  - c) Conocer el nombre del Técnico que le atiende.
  - d) Cumplir las normas existentes relacionadas con la solicitud del servicio y entrega de prescripciones.
  - e) Cumplir las normas de seguridad y prevención de accidentes especificadas en el manual de usuario de cada terapia.
2. **Mantener el debido respeto al personal asistencial.** Deberá tratar con el máximo respeto al personal asistencial de la empresa, tanto en el domicilio, oficinas de atención o atención telefónica.
3. **Cuidar y colaborar en el mantenimiento de los equipos que le han sido suministrados.**
  - a) Cuidar el equipo que le han proporcionado, evitando que sufra golpes, caídas o deterioro por mal uso.
  - b) Cumplir las normas de puesta en funcionamiento, uso e higiene de los equipos y accesorios, las cuales se encuentran recogidas en los manuales de usuario.
  - c) Avisar a la empresa en el caso de detectar anomalías relacionadas con el equipo, repuestos o accesorios.
4. **Responsabilizarse en lo que se refiere a la utilización de los materiales o accesorios de repuesto** (gafas nasales, mascarillas, sondas...) para que sea solicitada su reposición en función de necesidades reales.
5. **Responsabilizarse del uso adecuado de la prestación terapéutica.**

- a) Evitar que con ella se puedan ocasionar riesgos o perjuicios para la salud de otras personas (dejar sin control los equipos y que puedan ser utilizados por otras personas).

## 6. Comprometerse a realizar correctamente el tratamiento prescrito:

- a) Cumplir la prescripción según ha recomendado su médico para obtener el máximo beneficio de la terapia, sin modificar ninguno de los parámetros.
- b) Cumplir el tiempo de utilización mínimo indicado.
- c) Si a usted le hubiese sido prescrita una terapia de manera provisional (menor o igual a 3 meses), deberá acudir a la consulta de Neumología antes de la fecha de caducidad para **confirmar la prescripción como definitiva**, tanto si fue hecha por su neumólogo como si fue hecha por otro médico (urgencias, centro de salud...), salvo que su médico le indique que pueda tener otra prescripción provisional por 3 meses, en cuyo caso deberá entregar a la empresa dicha renovación provisional hecha por cualquier médico.
- d) Acudir a las consultas de revisión previstas tanto por su médico especialista como por la empresa en sus centros de atención, o lugar donde se le indique, o aquellas solicitadas por mala adherencia al tratamiento.
- e) No realizar prácticas contraindicadas con la terapia o que disminuyan los beneficios que aportan a su salud (por ejemplo fumar).

Mediante sistemas de control en los dispositivos o a través de la asistencia técnica, puede detectarse el incumplimiento y por ello podemos advertirle del mismo y le instaremos a que cumpla con la terapia prescrita.

Una vez hubiese recibido más de una advertencia y no hubiese modificado su nivel de cumplimiento, la empresa tiene la obligación de **notificar a los médicos prescriptores y al propio Hospital** todos aquellos pacientes con **incumplimiento reiterado**, que hayan realizado un **mal uso de la terapia**, que no hubiesen renovado sus prescripciones, que no hubiesen acudido a las consultas de revisión o que **no hubiesen cuidado de los equipos** según las normas facilitadas en los manuales.

En estos casos, podrán solicitarle que acuda a una **consulta de Neumología** o podrán **tomar, de acuerdo con la Unidad de Sueño**, la decisión de **dar de baja el servicio de la terapia, para lo cual se le proporcionará un documento de retirada voluntaria del tratamiento**.

En este documento quedará expresado con claridad que usted ha quedado suficientemente informado y rechaza la terapia.

- 7. **Debe facilitar de forma leal y cierta los datos de identificación y los referentes a su estado físico o sobre su salud que sean necesarios para el control clínico y seguimiento de la terapia.**
  - a) Deberá comunicar los cambios de domicilio y los ingresos hospitalarios.
- 8. **Tiene el deber de utilizar las vías de sugerencias, quejas y reclamación que la empresa y el propio Hospital ponen a su disposición.** Para ello tiene a su disposición hojas oficiales de reclamación que solicitará al personal asistencial en su domicilio o en los centros de atención de la empresa suministradora o dirigirse a través de las vías habituales de

contacto (teléfono, carta, fax o correo electrónico). Podrá también dirigirse a cualquier servicio de atención al paciente de los centros sanitarios.

**10. No olvide que tiene el deber de EXIGIR QUE SE CUMPLAN SUS DERECHOS.**

Puede consultar para ello la Ley 14/1986, de 25 de abril, General de Sanidad; Ley 41/2002 de 14 de noviembre básica de autonomía del paciente y de derechos y obligaciones en materia de información y documentación clínica.

Habiendo leído el documento y recibido las oportunas explicaciones, **manifiesto** que **he comprendido mis responsabilidades y obligaciones para con la terapia prescrita.**

Es por ello que firmo el presente documento como **prueba de aceptación del tratamiento, compromiso de realizar correctamente la terapia prescrita, acudir a consulta para renovación de la prescripción, acudir a las revisiones programadas por mi prescriptor y por la empresa y obligación del debido cuidado del equipo**

En \_\_\_\_\_, a \_\_\_\_\_ de \_\_\_\_\_ de 201\_\_

Fdo.: El Paciente,

Fdo.: El representante legal, familiar o  
allegado
