# Supplementary material
Source: Elsevier journal article supplement (https://www.sciencedirect.com/science/article/pii/S2659663620300175)
Supplement: mmc2 [file S2659663620300175:mmc2.pdf]

## Anexo 2

### MODELO DE DOCUMENTO DE RETIRADA VOLUNTARIA DEL EQUIPO DE TERAPIA RESPIRATORIA DOMICILIARIA

D. /Dña.: \_\_\_\_\_ de \_\_\_\_\_ años de edad, con domicilio en \_\_\_\_\_ y D.N.I. nº \_\_\_\_\_, nº de Identificación sanitaria SIP \_\_\_\_\_

D./Dña.: \_\_\_\_\_ de \_\_\_\_\_ años de edad, con domicilio en \_\_\_\_\_ y D.N.I. nº \_\_\_\_\_ en \_\_\_\_\_ calidad de \_\_\_\_\_

(Representante legal, familiar o allegado) (Nombre y dos apellidos del paciente)

Solicita de forma voluntaria la retirada del tratamiento con el equipo de CPAP/BIPAP/APAP....., Nº de Servicio \_\_\_\_\_, Nº de tratamiento \_\_\_\_\_, por motivos exclusivamente personales y al no cumplirse los objetivos de cumplimiento, de acuerdo con las instrucciones recibidas por mi Médico.

Autorizo a la empresa proveedora..... a la recogida del equipo, junto con el resto de elementos auxiliares que lo acompañan.

He sido informado de que existen otros tratamientos alternativos disponibles para el trastorno respiratorio de sueño que padezco y de que el hecho de renunciar al que llevaba hasta el momento, implicará el seguimiento por parte de mi médico, sin alterar la relación mantenida con anterioridad a la firma del presente documento.

La empresa me ha informado que declina cualquier responsabilidad por las consecuencias que se deriven de la retirada del mismo. Al mismo tiempo me informa que dicha decisión será comunicada a los Servicios Sanitarios correspondientes. He comprendido las explicaciones que se me han facilitado en lenguaje claro y sencillo, y se me ha permitido realizar todas las observaciones y me ha aclarado todas las dudas que le he planteado.

Por ello, manifiesto que estoy satisfecho de la información recibida y que comprendo el alcance del alcance de la Retirada Voluntaria del servicio de prestación de mi Terapia Respiratoria y en tales condiciones **CONSIENTO** que el servicio de prestación de la Terapia Respiratoria por parte de la empresa \_\_\_\_\_ sea retirado.

En \_\_\_\_\_, a \_\_\_\_\_ de \_\_\_\_\_ de 201\_\_

El/la paciente

Representante Empresa Suministradora

Fdo.....

Fdo.....
